# Supplementary material for: Association between Hyperglycemia at Hospital Presentation and Hospital Outcomes in COVID-19 Patients with and without Type 2 Diabetes: A Retrospective Cohort Study of Hospitalized Inner-City COVID-19 Patients
Source: MDPI journal article supplement (doi:10.3390/nu13072199), 2021-06-26
Supplement: s1 [file s1]

*Supplementary Materials*

# **Association between Hyperglycemia at Hospital Presentation and Hospital Outcomes in COVID-19 Patients with and without Type 2 Diabetes: A Retrospective Cohort Study of Hospitalized Inner-City COVID-19 Patients**

Nipith Charoenngam <sup>1,2</sup>, Sara M. Alexanian <sup>1</sup>, Caroline M. Apovian <sup>3</sup> and Michael F. Holick <sup>1,\*</sup>

**Table S1.** Univariate association of long-term diabetes control and use of anti-diabetic medications with hospital outcomes among patients with type 2 diabetes ( $N = 458$ ).

|                                         | Death      | <i>P</i> -value | ICU admission | <i>P</i> -value | Intubation | <i>P</i> -value | ARDS       | <i>P</i> -value | Myocardial infarction | <i>P</i> -value | Acute kidney injury | <i>P</i> -value | Severe sepsis/septic shock | <i>P</i> -value |
|-----------------------------------------|------------|-----------------|---------------|-----------------|------------|-----------------|------------|-----------------|-----------------------|-----------------|---------------------|-----------------|----------------------------|-----------------|
| <i>Long-term glycemic control</i>       |            |                 |               |                 |            |                 |            |                 |                       |                 |                     |                 |                            |                 |
| HbA1C <7%<br>( $N = 350$ )              | 14 (13.0%) | 0.901           | 24 (22.2%)    | 0.989           | 15 (13.9%) | 0.645           | 10 (9.3%)  | 0.636           | 11 (10.2%)            | 0.416           | 56 (51.9%)          | 0.050           | 16 (14.8%)                 | 0.891           |
| HbA1C ≥7%<br>( $N = 108$ )              | 47 (13.4%) |                 | 78 (22.3%)    |                 | 55 (15.7%) |                 | 38 (10.9%) |                 | 27 (7.7%)             |                 | 144 (41.1%)         |                 | 50 (14.3%)                 |                 |
| <i>Use of anti-diabetic medications</i> |            |                 |               |                 |            |                 |            |                 |                       |                 |                     |                 |                            |                 |
| Metformin<br>( $N = 193$ )              | 18 (9.3%)  | 0.032           | 35 (18.1%)    | 0.069           | 19 (9.8%)  | 0.006           | 16 (9.3%)  | 0.192           | 11 (5.7%)             | 0.085           | 85 (44.0%)          | 0.891           | 21 (10.9%)                 | 0.066           |
| No metformin<br>( $N = 265$ )           | 43 (16.2%) |                 | 67 (25.3%)    |                 | 51 (19.2%) |                 | 32 (12.1%) |                 | 27 (10.2%)            |                 | 115 (43.4%)         |                 | 45 (17.0%)                 |                 |
| DPP-4 inhibitors<br>( $N = 63$ )        | 8 (12.7%)  | 0.876           | 16 (25.4%)    | 0.521           | 9 (14.3%)  | 0.813           | 4 (6.3%)   | 0.374           | 6 (9.5%)              | 0.704           | 38 (60.3%)          | 0.004           | 9 (14.3%)                  | 0.976           |
| No DPP-4 inhibitors<br>( $N = 395$ )    | 53 (13.4%) |                 | 86 (21.8%)    |                 | 61 (15.4%) |                 | 44 (11.1%) |                 | 32 (8.1%)             |                 | 162 (41.0%)         |                 | 57 (14.4%)                 |                 |
| SGLT-2 inhibitors<br>( $N = 440$ )      | 0 (0.0%)   | 0.149           | 4 (22.2%)     | 1.000           | 2 (11.1%)  | 1.000           | 1 (5.6%)   | 0.708           | 2 (11.1%)             | 0.654           | 11 (61.1%)          | 0.128           | 2 (11.1%)                  | 0.684           |
| No SGLT-2 Inhibitors<br>( $N = 18$ )    | 61 (13.9%) |                 | 98 (22.3%)    |                 | 68 (15.5%) |                 | 47 (10.7%) |                 | 36 (8.2%)             |                 | 189 (43.0%)         |                 | 64 (14.5%)                 |                 |
| Sulfonylureas<br>( $N = 373$ )          | 4 (4.7%)   | 0.010           | 18 (21.2%)    | 0.788           | 11 (12.9%) | 0.506           | 5 (5.9%)   | 0.125           | 7 (8.2%)              | 0.982           | 44 (51.8%)          | 0.095           | 7 (8.2%)                   | 0.072           |

|                                |            |       |            |       |            |       |            |       |            |       |             |       |            |       |
|--------------------------------|------------|-------|------------|-------|------------|-------|------------|-------|------------|-------|-------------|-------|------------|-------|
| No sulfonylureas<br>(N = 85)   | 57 (15.3%) |       | 84 (22.5%) |       | 59 (15.8%) |       | 43 (11.5%) |       | 31 (8.3%)  |       | 156 (41.8%) |       | 59 (15.8%) |       |
| GLP-1 agonists<br>(N = 58)     | 7 (12.1%)  | 0.764 | 15 (25.9%) | 0.482 | 10 (17.2%) | 0.658 | 8 (13.8%)  | 0.378 | 6 (10.3%)  | 0.545 | 29 (50.0%)  | 0.298 | 8 (13.8%)  | 0.886 |
| No GLP-1 agonists<br>(N = 400) | 54 (13.5%) |       | 87 (21.8%) |       | 60 (15.0%) |       | 40 (10.0%) |       | 32 (8.0%)  |       | 171 (42.8%) |       | 58 (14.5%) |       |
| Insulin<br>(N = 290)           | 43 (14.8%) | 0.212 | 73 (25.2%) | 0.50  | 44 (15.2%) | 0.931 | 28 (9.7%)  | 0.449 | 29 (10.0%) | 0.083 | 142 (49.0%) | 0.003 | 48 (16.6%) | 0.086 |
| No insulin<br>(N = 168)        | 18 (10.7%) |       | 29 (17.3%) |       | 26 (15.5%) |       | 20 (11.9%) |       | 9 (5.4%)   |       | 38 (34.5%)  |       | 18 (10.7%) |       |

Abbreviations: DPP-4: Dipeptidyl Peptidase-4; GLP-1; Glucagon-like Peptide-1; HbA1C: Hemoglobin A1C; SGLT-2; Sodium-glucose Cotransporter-2.
